# Supplementary material for: Biosimilarity and Interchangeability: Principles and Evidence: A Systematic Review
Source: Springer Nature journal article supplement (doi:10.1007/s40259-017-0256-z), 2018-01-17
Supplement: MOESM1 [file 24111058]

## **Electronic supplementary material**

**Article title:** Biosimilarity and Interchangeability: Principles and Evidence – A Systematic Review

**Journal name:** BioDrugs

**Author names:** Ross A. McKinnon, Matthew Cook, Winston Liauw, Mona Marabani, Ian C. Marschner, Nicolle H. Packer, Johannes B. Prins

**Corresponding Author:** Ross A. McKinnon, PhD, FAHMS. School of Medicine, Flinders University, GPO Box 2100 Adelaide 5001, South Australia, Australia. Email: ross.mckinnon@flinders.edu.au.

**Supplementary Table 1.** Definitions of biosimilarity and interchangeability used in Australia, Europe and the USA.

|                               | <b>Biosimilarity</b>                                                                                                                                                                                                                                                                                                                                                                                                                                                                                                                                                                                                                         | <b>Interchangeability</b>                                                                                                                                                                                                                                                                                                                                                                                                                                                                                                                                                                          |
|-------------------------------|----------------------------------------------------------------------------------------------------------------------------------------------------------------------------------------------------------------------------------------------------------------------------------------------------------------------------------------------------------------------------------------------------------------------------------------------------------------------------------------------------------------------------------------------------------------------------------------------------------------------------------------------|----------------------------------------------------------------------------------------------------------------------------------------------------------------------------------------------------------------------------------------------------------------------------------------------------------------------------------------------------------------------------------------------------------------------------------------------------------------------------------------------------------------------------------------------------------------------------------------------------|
| Australia (TGA [5], PBAC [8]) | A version of an already registered biological medicine (the reference medicine) that has demonstrable similarity in physicochemical, biological and immunological characteristics, efficacy and safety. The drug substance of a biosimilar and its reference medicine are essentially the same. However, as with the reference medicine, a biosimilar has a degree of natural variability. Not only are there minor differences between reference medicines and their biosimilars, there are minor differences between batches of the same medicines. This is because of the complex, biologically based methods of producing the medicines. | The TGA do not define or assess interchangeability of biologic medicines. The Pharmaceutical Benefits Advisory Committee decide whether a biologic medicine is suitable for automatic substitution at the pharmacy level on a case by case basis.                                                                                                                                                                                                                                                                                                                                                  |
| Europe (EC [15] EMA [4])      | A biosimilar is a biological medicinal product that contains a version of the drug substance of an already authorised original biological medicinal product (reference medicinal product) in the European Economic Area. Similarity to the reference medicinal product in terms of quality characteristics, biological activity, safety and efficacy based on a comprehensive comparability exercise needs to be established.                                                                                                                                                                                                                | The medical practice of changing one medicine for another that is expected to achieve the same clinical effect in a given clinical setting and in any patient on the initiative, or with the agreement of the prescriber. The decisions on interchangeability rely on national authorities and are outside the remit of the EMA.                                                                                                                                                                                                                                                                   |
| USA (FDA [9])                 | The biological product is highly similar to the reference product notwithstanding minor differences in clinically inactive components; there are no clinically meaningful differences between the biological product and the reference product in terms of the safety, purity and potency of the product.                                                                                                                                                                                                                                                                                                                                    | The biological product can be expected to produce the same clinical result as the reference product in any given patient and, if the biological product is administered more than once to an individual, the risk in terms of safety or diminished efficacy of alternating or switching between the use of the biological product and the reference product is not greater than the risk of using the reference product without such alternation or switch. Interchangeable products may be substituted for the reference product without the intervention of the prescribing healthcare provider. |

EC, European Commission; EMA, European Medicines Agency; FDA, US Food and Drug Administration; PBS, Australian Pharmaceutical Benefits Scheme; TGA, Australian Therapeutic Goods Administration.

**Supplementary Table 2.** Professional societies position statements on biosimilar substitution.

| <b>Society</b>          | <b>Position statement</b>                                                                                                                                                                                                                                                                                                                                                                                                             |
|-------------------------|---------------------------------------------------------------------------------------------------------------------------------------------------------------------------------------------------------------------------------------------------------------------------------------------------------------------------------------------------------------------------------------------------------------------------------------|
| <b>ECCO</b> [36]        | Any decision to substitute a product should only be made with the prescribing health care provider's specific approval and patient's knowledge.                                                                                                                                                                                                                                                                                       |
| <b>AAD</b> [26]         | Biosimilars must be carefully evaluated by a patient's physician and health care team to determine the benefits and risks of a biosimilar substitution. It is imperative that data be collected regarding efficacy and safety, and that these products have different names so that medical records can fully reflect the exact medication prescribed and taken.                                                                      |
| <b>ACR</b> [22]         | The decision to substitute a biosimilar product for a reference drug should only be made by the prescribing provider.                                                                                                                                                                                                                                                                                                                 |
| <b>ADS</b> [23]         | We support substitution of insulins under appropriate medical supervision and with the involvement of the diabetes healthcare team including diabetes educators and practice nurses.                                                                                                                                                                                                                                                  |
| <b>ARA</b> [35]         | The decision to prescribe any medication should rest with the prescriber, in consultation with an informed patient. Substitution should not occur without the knowledge and consent of the patient.                                                                                                                                                                                                                                   |
| <b>ASCO</b> [24]        | No system should be adopted that would limit physician choice among "biosimilar" products or require substitution of products that have been designated "interchangeable." In every instance, the physician should decide which among similar products should be prescribed.                                                                                                                                                          |
| <b>CAG</b> [32]         | Subsequent entry biologics cannot be regarded as interchangeable with the reference biologic drug. Prescriptions for reference biologic drugs should not be automatically substituted for less expensive subsequent entry biologics by dispensing pharmacies.                                                                                                                                                                         |
| <b>ESMO</b> [27]        | Interchangeability and switching should only be permitted if: (1) the physician is well-informed about the products; (2) the patient is fully briefed by the physician and (3) a nurse is closely monitoring the changes and tracking any adverse events.                                                                                                                                                                             |
| <b>EULAR</b> [37]       | Many patients consider that leaving open the possibility of switching, interchangeability and substitution would introduce unacceptable uncertainties into that decision-making process. While appreciating the realities of economic pressure on health services and insurers across Europe, patients strongly believe that decisions about prescribing biosimilars should be made on clinical grounds and not on financial grounds. |
| <b>GESA, AIBDA</b> [33] | We strongly oppose such recommendations of biosimilars as interchangeable on the grounds of patient safety.                                                                                                                                                                                                                                                                                                                           |
| <b>IG-IBD</b> [28, 29]  | An IBD patient being effectively controlled with an original biopharmaceutical should not be switched to a drug claimed to be that drug's biosimilar until preliminary data supporting such changes have been reported. In addition, the change must be approved by the specialist prescribing the original biologic and be implemented after obtaining the patient's written informed consent.                                       |
| <b>NRAS</b> [25]        | Substitution of a biosimilar product should only occur under the direct supervision and consent of the treating healthcare professional and with patient agreement.                                                                                                                                                                                                                                                                   |
| <b>SER</b> [30]         | The substitution of a biological with a biosimilar is a medical decision that should be made exclusively by the prescribing physician and with patient consent.                                                                                                                                                                                                                                                                       |

AAD, American Academy of Dermatology; ACR, American College of Rheumatology; ADS, Australian Diabetes Society; AIBDA, Australian Inflammatory Bowel Disease Association; ARA, Australian Rheumatology Association; ASCO, American Society of Clinical Oncology; CAG, Canadian Association of

Gastroenterology; ECCO, European Crohn's and Colitis Organisation; EULAR, European League against Rheumatism; ESMO, European Society for Medical Oncology; GESA, Gastroenterological Society of Australia; IG-IBD, Italian Group for the study of Inflammatory Bowel Disease; NRAS, United Kingdom National Rheumatoid Arthritis Society; SER, Sociedad Espanola de Reumatología (Spanish Society of Rheumatology).

**Supplementary Table 3.** Overview of switching studies.

| Reference                                  | Treatment | Indication for treatment | Study design                                                         | Comparators                                                                                                                    | Patients, N        | Age, years                                           | % male            | Reason for switch  |
|--------------------------------------------|-----------|--------------------------|----------------------------------------------------------------------|--------------------------------------------------------------------------------------------------------------------------------|--------------------|------------------------------------------------------|-------------------|--------------------|
| Abdalla <i>et al.</i> 2017 [43]            | INX       | Inflammatory arthritis   | Observational, retrospective (pre-switch)/ prospective (post-switch) | Pre-switch (originator INX; mean duration: 70 months) vs post-switch (biosimilar INX; mean follow-up: 16 months)               | 34                 | Mean: 55 (range: NR; SD: 13)                         | 50                | Non-medical (cost) |
| Ala <i>et al.</i> 2016 (abstract) [44]     | INX       | IBD (CD)                 | Observational, prospective                                           | Baseline (INX RP) vs post-switch (biosimilar, 6 months)                                                                        | 20                 | NR                                                   | NR                | Non-medical (cost) |
| Arguelles-Arias <i>et al.</i> 2017 [45]    | INX       | IBD (CD, UC)             | Observational, prospective                                           | Switched (originator INX; median duration: 297 weeks, or INX-naïve) vs naïve (post-switch biosimilar INX; follow-up: 6 months) | 120                | CD, median: 41 (SD: 13); UC, median: 44 (SD: 13)     | CD: 53; UC: 58    | Non-medical (NR)   |
| Bennett <i>et al.</i> 2016 (abstract) [46] | INX       | IBD (CD, UC)             | Observational, prospective                                           | Pre-switch (INX RP; week 0, median time on INX-RP: 162 weeks) vs post-switch (CT-P13; follow-up: 6 months)                     | 104 (73 CD; 31 UC) | Mean: 43 (range: 17–71)                              | 52                | Non-medical (cost) |
| Benucci <i>et al.</i> 2017 [47]            | INX       | SpA                      | Observational, prospective                                           | Pre-switch (originator INX; median duration: 74 months) vs post-switch (biosimilar INX; follow-up: 6 months)                   | 41                 | Median: 51 (range: 23–80; SD: NR)                    | NR                | Non-medical (cost) |
| Buer <i>et al.</i> 2017 [48]               | INX       | IBD (CD, UC)             | Observational, prospective                                           | Pre-switch (originator INX; data from 6 months pre-switch) vs post-switch (CT-P13; follow-up: 6 months)                        | 143                | Median, CD: 36 (range: 17–83); UC: 35 (range: 19–72) | 64                | Non-medical (cost) |
| Dapavo <i>et al.</i> 2016 [49]             | INX       | Plaque Psoriasis         | Observational, prospective                                           | Pre-switch (INX RP; median duration: 237 weeks) vs post-switch (CT-P13; median follow-up: 23 weeks, median 4 cycles)           | 35                 | Mean: 52 (range: 28–86)                              | 87 (switch group) | Non-medical (NR)   |

| Reference                                                   | Treatment | Indication for treatment                               | Study design                 | Comparators                                                                                                                        | Patients, N                                                            | Age, years                                                                      | % male                             | Reason for switch                                                          |
|-------------------------------------------------------------|-----------|--------------------------------------------------------|------------------------------|------------------------------------------------------------------------------------------------------------------------------------|------------------------------------------------------------------------|---------------------------------------------------------------------------------|------------------------------------|----------------------------------------------------------------------------|
| Fiorino <i>et al.</i> 2017 [50]                             | INX       | IBD                                                    | Observational, prospective   | Treatment-naïve then CT-P13 vs INX RP (mean 18 infusions) then CT-P13 vs other anti-TNF biologic then CT-P13 (follow-up: 6 months) | 547 (naïve/CT-P13: 311; INX RP/CT-P13: 97; other/CT-P13: 139)          | NR                                                                              | 66 (switch group)                  | Non-medical (study design)                                                 |
| Gentileschi <i>et al.</i> 2016 (letter to editor) [51]      | INX       | Rheumatic diseases                                     | Observational, prospective   | Pre-switch (INX RP [Remicade]; mean duration: 72 months) vs post-switch (CT-P13 [Inflectra]; mean duration: 1.7 months)            | 23                                                                     | NR                                                                              | NR                                 | Non-medical (local regulatory issues)                                      |
| Glintborg <i>et al.</i> 2016 (abstract) [105] and 2017 [52] | INX       | Mixed (rheumatoid arthritis, SpA and PsA)              | Observational, prospective   | Pre-switch (INX RP; duration: 6.8 years) vs post-switch (CT-P13; median follow-up: 413 days)                                       | 802                                                                    | Median: 55 (range: 44–66)                                                       | 59                                 | Non-medical (national guidelines)                                          |
| Jorgensen <i>et al.</i> 2017 [53]                           | INX       | Mixed (CD, UC, SpA, RA, PsA, chronic plaque psoriasis) | RCT (NOR-SWITCH)             | Pre-switch (INX RP; mean duration: 6.8 years) vs post-switch (CT-P13; follow-up: 52 weeks)                                         | 482                                                                    | Mean, INX RP: 48 (SD: 15); CT-P13: 48 (SD: 15)                                  | INX RP: 59; CT-P13: 64             | Non-medical (study design)                                                 |
| Jung <i>et al.</i> 2015 [54]                                | INX       | IBD                                                    | Observational, retrospective | Treatment-naïve then CT-P13 vs INX RP (duration NR) then CT-P13 (duration: up to 54 weeks)                                         | 110 (CT-P13 only: 74; INX RP/CT-P13: 36)                               | CT-P13 only: CD, mean: 28 (range: NR; SD: 13); UC, mean: 39 (range: NR; SD: 14) | CT-P13 only: 74; INX RP/CT-P13: 69 | Cost reported as main reason (proportion of patients and other reasons NR) |
| Kay <i>et al.</i> 2015 (abstracts and poster) [55, 56]      | INX       | Rheumatoid arthritis                                   | Open label extension of RCT  | Continuation (54 weeks BOW015) vs switch (16 weeks INX RP then 38 weeks BOW015)                                                    | RCT: 189 (BOW015/BOW015: 127; INX RF/BOW015: 62); then open label: 157 | Mean: 45 (range or SD: NR)                                                      | 12                                 | Non-medical (study design)                                                 |

| Reference                                  | Treatment | Indication for treatment | Study design                            | Comparators                                                                                                                            | Patients, N                                | Age, years                                                                         | % male                               | Reason for switch                                                           |
|--------------------------------------------|-----------|--------------------------|-----------------------------------------|----------------------------------------------------------------------------------------------------------------------------------------|--------------------------------------------|------------------------------------------------------------------------------------|--------------------------------------|-----------------------------------------------------------------------------|
| Kolar <i>et al.</i> 2017 [57]              | INX       | IBD                      | Observational, prospective              | Baseline (Wk 0, INX RP; mean duration: 3 years) vs post-switch (biosimilar INX; duration: 56 weeks)                                    | 74 (56 CD, 18 UC)                          | Mean: 34 (range: 21–57)                                                            | 51                                   | NR                                                                          |
| Nikiphorou <i>et al.</i> 2015 [58]         | INX       | Rheumatic diseases       | Observational, prospective              | Pre-switch (INX RP; mean duration: 4 years) vs post-switch (CT-P13; follow-up: 11 months)                                              | 39                                         | Mean: 53 (range: 19–74)                                                            | 68                                   | Non-medical (scientific evidence, emerging policies, spending expectations) |
| Park <i>et al.</i> 2015 [59]               | INX       | IBD                      | Open-label, prospective, post-marketing | Treatment-naïve then CT-P13 vs INX RP (duration NR) then CT-P13 (duration: 30 weeks)                                                   | 173 (CT-P13 only: 113; INX RP/CT-P13: 60)  | CT-P13 only, mean: 39 (range: 18–74); INX RP/CT-P13, mean: 34 (range: 19–64)       | CT-P13 only: 71; INX RP/CT-P13: 60   | NR                                                                          |
| Park <i>et al.</i> 2017 [61]               | INX       | AS                       | RCT (PLANETAS) and open-label extension | Continuation (102 weeks CT-P13) vs switch (54 weeks INX RP then 48 weeks CT-P13)                                                       | 174 (CT-P13/CT-P13: 88; INX RP/CT-P13: 86) | CT-P13/CT-P13, median: 36 (range: 18–69); INX RP/CT-P13, median: 39 (range: 18–66) | CT-P13/CT-P13: 77; INX RP/CT-P13: 86 | Non-medical (study design)                                                  |
| Rahmany <i>et al.</i> 2016 (abstract) [62] | INX       | IBD (CD, UC)             | Observational, prospective              | Pre-switch (INX RP; median treatment duration, CD: 46 months, UC: 25 months) vs post-switch (CT-P13, most recent infusion, 4–6 months) | 78 (63 CD, 15UC)                           | Mean, CD: 43; UC: 42                                                               | NR                                   | Non-medical (cost)                                                          |
| Razanskaite <i>et al.</i> 2017 [63]        | INX       | IBD (CD, UC)             | Observational, prospective              | Pre-switch (INX RP; median number of infusions 10) vs post-switch (CT-P13; follow-up: $\geq 3$ infusions)                              | 143 (118 CD, 23 UC; 2 unclassified)        | Median: 39 (range: 17–87)                                                          | 43                                   | Non-medical (cost)                                                          |

| Reference                                   | Treatment | Indication for treatment                                                 | Study design                           | Comparators                                                                                                            | Patients, N                                            | Age, years                                               | % male | Reason for switch                            |
|---------------------------------------------|-----------|--------------------------------------------------------------------------|----------------------------------------|------------------------------------------------------------------------------------------------------------------------|--------------------------------------------------------|----------------------------------------------------------|--------|----------------------------------------------|
| Rubio <i>et al.</i> 2016 (abstract) [64]    | INX       | Rheumatic diseases                                                       | Observational, prospective             | INX RP (Remicade; duration: NR) vs biosimilar (Remsima; follow-up: 9 months)                                           | 78 (25 naive, 53 switched)                             | NR                                                       | NR     | NR                                           |
| Schmitz <i>et al.</i> 2017 [67]             | INX       | Mixed (rheumatoid arthritis, PsA, AS, SpA, psoriasis, arthritis with UC) | Observational, prospective             | Pre-switch (baseline; INX-RP) vs post-switch (CT-P13; immediately, approx. 6 months and approx. 12 months post-switch) | 27                                                     | Median: 60 (IQR: 48–68)                                  | 37     | Non-medical (cost)                           |
| Sheppard <i>et al.</i> 2016 (abstract) [65] | INX       | Rheumatic diseases                                                       | Observational, prospective             | Pre-switch (INX RP; duration: NR) vs post-switch (CT-P13; duration: NR)                                                | 25                                                     | NR                                                       | NR     | Non-medical (cost)                           |
| Sieczkowska <i>et al.</i> 2016 [66]         | INX       | IBD (paediatric)                                                         | Observational, prospective             | Pre-switch (INX RP; mean duration: 67 weeks) vs post-switch (CT-P13; mean follow-up: 8 months)                         | 39 (CD: 32; UC: 7)                                     | CD: 11 (range: 3–15); UC: 12 (range: 9–15)               | NR     | Non-medical (local regulatory, availability) |
| Smits <i>et al.</i> 2016 [68]               | INX       | IBD                                                                      | Observational, prospective             | Pre-switch (INX RP; median duration: 25 months) vs post-switch (CT-P13; duration: 16 weeks)                            | 83                                                     | Median: 36 (range: 18–79)                                | 34     | Non-medical (local directives)               |
| Smolen <i>et al.</i> 2016 (abstract) [69]   | INX       | Rheumatoid arthritis                                                     | RCT and extension                      | Continuation (78 weeks INX RP or SB2) vs switch (54 weeks INX RP then 24 weeks SB2)                                    | 396 (INX RP/INX/RP: 101; SB2/SB2: 201; INX RP/SB2: 94) | NR                                                       | NR     | Non-medical (study design)                   |
| Tanaka <i>et al.</i> 2017 [70]              | INX       | Rheumatoid arthritis                                                     | Open-label single-arm extension of RCT | Continuation of CT-P13 vs switch to CT-P13 from INX RP                                                                 | 104                                                    | Mean, continued CT-P13: 54 (SD: 12); switch: 57 (SD: 11) | 21     | Non-medical (study design)                   |



| Reference                                     | Treatment                                                               | Indication for treatment               | Study design                                            | Comparators                                                                                                                                | Patients, N                                | Age, years                                                                                  | % male                                             | Reason for switch          |
|-----------------------------------------------|-------------------------------------------------------------------------|----------------------------------------|---------------------------------------------------------|--------------------------------------------------------------------------------------------------------------------------------------------|--------------------------------------------|---------------------------------------------------------------------------------------------|----------------------------------------------------|----------------------------|
| Tweehuysen <i>et al.</i> 2016 (abstract) [71] | INX                                                                     | Mixed (rheumatoid arthritis, PsA, SpA) | Observational, prospective                              | Pre-switch (innovator INX, month 0) vs post-switch (biosimilar INX, 6 months)                                                              | Rheumatoid arthritis: 65; PsA: 50; SpA: 67 | NR                                                                                          | NR                                                 | Non-medical (cost)         |
| Yazici <i>et al.</i> 2016 (abstract) [72]     | INX                                                                     | Rheumatoid arthritis                   | Retrospective chart review                              | Continuation (INX RP) vs switch (to CT-P13)                                                                                                | 3018 (continuation: 2870; switch: 148)     | Mean: 44                                                                                    | 49                                                 | Non-medical (cost)         |
| Yoo <i>et al.</i> 2017 [73]                   | INX                                                                     | Rheumatoid arthritis                   | PLANETRA RCT open-label extension                       | Continuation (102 weeks CT-P13) vs switch (54 weeks INX RP then 48 weeks CT-P13)                                                           | CT-P13/CT-P13: 158; INX RP/CT-P13: 144)    | CT-P13/CT-P13, median: 50 (range: 18–73); INX RP/CT-P13, median: 49 (range: 23–74)          | CT-P13/CT-P13: 21; INX RP/CT-P13: 15               | Non-medical (study design) |
| Haag-Weber <i>et al.</i> 2009 [74]            | ESA epoetin alfa)                                                       | Renal anaemia                          | Open-label extension                                    | Continuation (56 weeks HX575) vs switch (28 weeks ESA RP [Eprex/Erypo] then 28 weeks HX575)                                                | 386 (HX575/HX575: 249; ESA RP/HX575: 137)  | Reported only for RCT part – HX575, mean: 62 (range: 23–90); ESA RP, mean: 63 (range 24–88) | Reported only for RCT part – HX575: 56; ESA RP: 60 | Non-medical (study design) |
| Harzallah <i>et al.</i> 2015 [75]             | ESA (epoetin alfa)                                                      | Renal anaemia                          | Cross-over (blinding NR)                                | Pre-switch (1 <sup>st</sup> epoetin NR then 15 days epoetin alfa RP [Hemax]) vs post-switch (epoetin alfa biosimilar [Epomax] for 43 days) | 53                                         | Mean: 48 (range: 27–81)                                                                     | 34                                                 | Non-medical (study design) |
| Hörbrand <i>et al.</i> 2013 [76]              | ESA (epoetin alfa [short- and long-acting], beta, delta, theta or zeta) | Renal anaemia                          | Observational, retrospective (insurance database study) | Pre-switch ( $\geq 3$ months) vs post-switch ( $\geq 3$ months)                                                                            | 6177 (of whom 507 switched therapy)        | 67 (range: NR; SD: 67)                                                                      | 53                                                 | NR                         |

| Reference                                                         | Treatment | Indication for treatment     | Study design                                                       | Comparators                                                                                                                                                  | Patients, N                                    | Age, years                        | % male | Reason for switch          |
|-------------------------------------------------------------------|-----------|------------------------------|--------------------------------------------------------------------|--------------------------------------------------------------------------------------------------------------------------------------------------------------|------------------------------------------------|-----------------------------------|--------|----------------------------|
| Lopez <i>et al.</i> 2014 (abstract) [77]                          | ESA       | Chemotherapy-induced anaemia | Retrospective chart review                                         | Pre-switch (epoetin alfa, darbepoetin alfa; 12-month period) vs post-switch (epoetin zeta; 12-month period)                                                  | 28                                             | NR                                | NR     | Non-medical (cost)         |
| Minutolo <i>et al.</i> 2016 [78]                                  | ESA       | Undergoing haemodialysis     | Observational, retrospective                                       | Pre-switch (epoetin, darbepoetin; duration: NR) vs post-switch (HX575, SB309; duration: NR)                                                                  | 149                                            | Mean: 71 (range: NR; SD: 13)      | 61     | NR                         |
| Morosetti <i>et al.</i> 2017 [79] <sup>a</sup>                    | ESA       | Chronic renal failure        | Observational, prospective                                         | Pre-switch (ESA; 6 month vs post-switch (biosimilar; 6 months)                                                                                               | 87                                             | Mean: 65                          | 41     | Non-medical (cost)         |
| Ohta <i>et al.</i> 2014 [80]                                      | ESA       | Renal anaemia                | Observational, retrospective                                       | Pre-switch (epoetin beta; duration: 3 months) vs post-switch (epoetin kappa; duration: 3 months)                                                             | 30                                             | Mean: 63 (range: NR; SD: 11)      | 87     | NR                         |
| Wiecek <i>et al.</i> 2010 [81], Wizeman <i>et al.</i> 2008 [82]   | ESA       | Renal anaemia                | Induction RCT and open-label extension; <i>post hoc</i> analysis   | Pre-switch ( $\geq 12$ weeks) vs post-switch ( $\geq 12$ weeks) from epoetin alfa to epoetin zeta or vice versa                                              | 239 (switch group 1: 118; switch group 2: 121) | Median: 57 (range: 20–77; SD: NR) | 59     | Non-medical (study design) |
| Wiecek <i>et al.</i> 2010 [81]                                    | ESA       | Renal anaemia                | Maintenance RCT and open-label extension; <i>post hoc</i> analysis | Pre-switch ( $\geq 12$ weeks) vs post-switch ( $\geq 12$ weeks) from epoetin alfa to epoetin zeta or vice versa                                              | 242                                            | Median: 54 (range: 20–76; SD: NR) | 59     | Non-medical (study design) |
| Balili <i>et al.</i> 2015 (abstract) [83]                         | Insulin   | T2DM                         | Observational, retrospective                                       | Pre-switch (Humulin 70/30; duration NR) vs post-switch (Wosulin 70/30)                                                                                       | 24                                             | Mean: NR (range: 40–77)           | 33     | Non-medical (cost)         |
| Hadjiyianni <i>et al.</i> 2016 [84], Ilag <i>et al.</i> 2016 [85] | Insulin   | T1DM                         | RCT (Element 1)                                                    | Pre-study insulin vs insulin-naive at study entry; in RCT, patients randomized to insulin glargine RP (IGlar; Lantus <sup>®</sup> ) or biosimilar (LY IGlar) | With pre-study IGlar treatment: 452            | Mean: 41 (range: NR; SD: 14)      | 59     | Non-medical (study design) |

| Reference                                                                                             | Treatment | Indication for treatment | Study design                 | Comparators                                                                                                                                       | Patients, N                                                       | Age, years                                                                                                              | % male                                                     | Reason for switch                          |
|-------------------------------------------------------------------------------------------------------|-----------|--------------------------|------------------------------|---------------------------------------------------------------------------------------------------------------------------------------------------|-------------------------------------------------------------------|-------------------------------------------------------------------------------------------------------------------------|------------------------------------------------------------|--------------------------------------------|
| Hadjiyianni <i>et al.</i> 2016 [84], Ilag <i>et al.</i> 2016 [85], Rosenstock <i>et al.</i> 2015 [86] | Insulin   | T2DM                     | RCT (Element 2)              | Pre-study insulin vs insulin-naive at study entry; in RCT, patients randomized to insulin glargine RP (IGlar; Lantus®) or biosimilar (LY IGLar)   | With pre-study IGLar treatment: 299                               | Mean: 60 (range: NR; SD: 10)                                                                                            | 47                                                         | Non-medical (study design)                 |
| Segal <i>et al.</i> 2013 [87]                                                                         | Insulin   | T1DM, T2DM               | Observational, prospective   | Pre-switch (Actraphane, Humulin 30/70 or Insuman; insulin duration: 7 years) vs post-switch (Biosulin 30/70; duration: 6 months)                  | 77                                                                | Mean: 50 (range: 26–75; SD: NR)                                                                                         | 47                                                         | Non-medical (study design)                 |
| Flodmark <i>et al.</i> 2013 [88] (commentary: Ekelund <i>et al.</i> 2014 [129])                       | rhGH      | Growth disturbances      | Observational, prospective   | Pre-switch (genotropin RP; duration NR [graph suggests up to 2 years]) vs post-switch (Omnitrope; duration NR [graph suggests up to 1.5–2 years]) | 98                                                                | mean/median: NR (range: 1–15; SD: NR);                                                                                  | 53                                                         | Non-medical (cost)                         |
| Gila <i>et al.</i> 2014 (abstract) [89]                                                               | rhGH      | Growth disturbances      | Observational, retrospective | Pre-switch (rhGH RP; duration: 38 months) vs post-switch (Omnitrope; follow-up: 36 months)                                                        | 20                                                                | Mean: 15 (range: NR)                                                                                                    | 75                                                         | Non-medical (hospital-level switch)        |
| Rashid <i>et al.</i> 2014 [90]                                                                        | rhGH      | Growth disturbances      | Observational, retrospective | Pre-switch (Humatrope, Norditropin, Nutropin and/or Saizen, duration: ≥ 15 months) vs post-switch (Omnitrope, duration: 15 months)                | 103 (Growth hormone deficiency: 57; ISS: 26; Turner Syndrome: 20) | Growth hormone deficiency, mean: 11 (range: 2–17); ISS: mean 13 (range: 10–17); Turner Syndrome: mean: 10 (range: 5–14) | Growth hormone deficiency: 53; ISS: 65; Turner Syndrome: 0 | Non-medical (health fund formulary change) |

| Reference                                                                   | Treatment  | Indication for treatment                  | Study design                                                                   | Comparators                                                                                                                                  | Patients, N                                             | Age, years                                                                                      | % male                                | Reason for switch          |
|-----------------------------------------------------------------------------|------------|-------------------------------------------|--------------------------------------------------------------------------------|----------------------------------------------------------------------------------------------------------------------------------------------|---------------------------------------------------------|-------------------------------------------------------------------------------------------------|---------------------------------------|----------------------------|
| Romer <i>et al.</i> 2011 [92] (modelling Belleli <i>et al.</i> 2015 [91])   | rhGH       | Growth disturbances                       | Analysis and modelling using data from 3 RCTs, one of which was a switch study | Continuation (15 months omnitrope powder then 69 months omnitrope solution) vs switch (9 months genotrope then 75 months omnitrope solution) | 166                                                     | Mean: 7–9 (range: NR; SD: 2.4–2.8)                                                              | 47–63                                 | Non-medical (study design) |
| Engert <i>et al.</i> 2009 [93]                                              | G-CSF      | Chemotherapy-induced neutropenia          | RCT                                                                            | Continuation (XM02 in all chemotherapy cycles) vs switch (filgrastim RP in 1 <sup>st</sup> cycle, then XM02)                                 | 92 (XM02/XM02: 63; filgrastim RP/XM02: 29)              | XM02/XM02: mean: 50 (range: 18–83; SD: 16); filgrastim RP/XM02: mean: 57 (range: 33–83; SD: 15) | XM02/XM02: 49; filgrastim RP/XM02: 59 | Non-medical (study design) |
| Gatzemeier <i>et al.</i> 2009 [94]                                          | G-CSF      | Chemotherapy-induced neutropenia          | RCT                                                                            | Continuation (XM02 in all chemotherapy cycles) vs switch (filgrastim RP in 1 <sup>st</sup> cycle, then XM02)                                 | 240 (XM02/XM02: 160; filgrastim RP/XM02: 80)            | XM02/XM02: mean: 59 (range: 34–78); filgrastim RP/XM02: mean: 58 (range: 34–78)                 | XM02/XM02: 80; filgrastim RP/XM02: 77 | Non-medical (study design) |
| Krendyukov <i>et al.</i> 2017 (abstract) [95]                               | G-CSF      | Prevention of neutropenia (breast cancer) | RCT                                                                            | Filgrastim RP vs switch from filgrastim RP to biosimilar in cycles 2–6                                                                       | 218                                                     | NR                                                                                              | NR                                    | Non-medical (study design) |
| Papp <i>et al.</i> 2017 [97]; Gooderham <i>et al.</i> 2016, (abstract) [96] | Adalimumab | Plaque psoriasis                          | RCT                                                                            | Continuation (ABP501 or adalimumab for 52 weeks) vs switch (adalimumab for 16 weeks then ABP501 for 36 weeks <sup>b</sup> )                  | 350 (ABP501: 175; adalimumab or adalimumab/ABP501: 175) | ABP501, median: 46 (IQR: 35–54); adalimumab RP: 41 (IQR: 33–56) (at initial randomisation)      | 66                                    | Non-medical (study design) |

| Reference                                       | Treatment  | Indication for treatment      | Study design                                          | Comparators                                                                                                                                                                                                                                                              | Patients, N                                                         | Age, years                                                            | % male                                 | Reason for switch          |
|-------------------------------------------------|------------|-------------------------------|-------------------------------------------------------|--------------------------------------------------------------------------------------------------------------------------------------------------------------------------------------------------------------------------------------------------------------------------|---------------------------------------------------------------------|-----------------------------------------------------------------------|----------------------------------------|----------------------------|
| Weinblatt <i>et al.</i> 2016 (abstract) [98]    | Adalimumab | Rheumatoid arthritis          | RCT                                                   | Continuation (52 weeks SB5 or 52 weeks adalimumab) vs switch (24 weeks adalimumab then 28 weeks SB5)                                                                                                                                                                     | 506 (SB5/SB5: 254; adalimumab/SB5: 125; adalimumab/adalimumab: 127) | NR                                                                    | NR                                     | Non-medical (study design) |
| Nasanov <i>et al.</i> 2016 (abstract) [99]      | Rituximab  | Rheumatoid arthritis          | RCT; patients re-randomised at week 24 (switch phase) | Pre-switch (24 weeks RTX RP or 24 weeks BCD-020) vs post-switch (24 weeks BCD-020 or 24 weeks RTX RP)                                                                                                                                                                    | 160                                                                 | NR                                                                    | NR                                     | Non-medical (study design) |
| Park <i>et al.</i> 2017 [60]                    | Rituximab  | Rheumatoid arthritis          | RCT open-label extension                              | Continuation (up to 128 weeks CT-P10) vs switch (up to 72 weeks rituximab then up to 56 weeks CT-P10)                                                                                                                                                                    | 58 (CTP-10/CT-P10: 38; rituximab/CT-P10: 20)                        | CT-P10/CT-P10, mean: 51 (SD: 11); rituximab/CT-P10, mean: 50 (SD: 11) | CT-P10/CT-P10: 8; rituximab/CT-P10: 10 | Non-medical (study design) |
| Roy <i>et al.</i> 2013 [100]                    | Rituximab  | Non-Hodgkin's B cell lymphoma | Observational, retrospective                          | Rituximab RP (Mabthera), biosimilar (Reditux) vs both (i.e. switched) ( $\geq 4$ cycles with 1 brand)                                                                                                                                                                    | 223 (of whom 29 switched)                                           | Mean: NR (range: NR; SD: NR)                                          | 70                                     | NR                         |
| Emery <i>et al.</i> 2016 (abstracts) [101, 102] | ETN        | Rheumatoid arthritis          | Open-label (extension of 52-week RCT)                 | Continuation (52 weeks SB4 in RCT then 48 weeks SB4) vs switch (52 weeks ETN RP in RCT then 48 weeks SB4)                                                                                                                                                                | 245 (SB4/SB4: 126; ETN/SB4: 119)                                    | NR                                                                    | NR                                     | Non-medical (study design) |
| Griffiths <i>et al.</i> 2017 [103]              | ETN        | Chronic plaque psoriasis      | RCT                                                   | Pre-switch (GP2015 or ETN, 12 weeks) vs post-switch (patients with PASI improvement $\geq 50\%$ re-randomised to same treatment with different dosing schedule or to series of 3 treatment switches to week 30, then continuation on last assigned treatment to week 52) | 531                                                                 | Mean, GP2015: 42 (SD: 12); ETN RP: 43 (13)                            | GP2015: 60; ETN RP: 64                 | Non-medical (study design) |

| Reference                           | Treatment                    | Indication for treatment | Study design             | Comparators                                                                                                                                                  | Patients, N | Age, years                  | % male | Reason for switch          |
|-------------------------------------|------------------------------|--------------------------|--------------------------|--------------------------------------------------------------------------------------------------------------------------------------------------------------|-------------|-----------------------------|--------|----------------------------|
| Strowitzki <i>et al.</i> 2016 [104] | Follicle-stimulating hormone | Ovarian stimulation      | RCT open-label extension | Continuation (Ovaleap [1 cycle in RCT plus ≤ 2 cycles in extension study]) vs switch (Gonal-f [1 cycle in RCT] then Ovaleap [≤ 2 cycles in extension study]) | 147         | Mean: 32 (range: NR; SD: 3) | 0      | Non-medical (study design) |

<sup>a</sup>Data extracted from English-language abstract (full text in Italian).

<sup>b</sup>Of 175 patients on adalimumab, those with PASI ≥ 50 at 16 weeks were re-randomized 1:1 to remain on adalimumab or switch to ABP501.

ABP501, adalimumab biosimilar; AS, ankylosing spondylitis; BOW015, infliximab biosimilar; CD, Crohn's disease; CT-P10, biosimilar rituximab; CT-P13, biosimilar infliximab; ESA, erythropoietin-stimulating agent; ETN, etanercept; G-CSF, granulocyte colony-stimulating factor; HX575, epoetin alfa biosimilar; IBD, inflammatory bowel disease; INX, infliximab; ISS, idiopathic short stature; NR, not reported; PK/PD, pharmacokinetics/pharmacodynamics; PsA, psoriatic arthritis; RCT, randomised controlled trial; rhGH, recombinant human growth hormone; RP, reference product; SB2, infliximab biosimilar; SB4, etanercept biosimilar; SB5, adalimumab biosimilar; SD, standard deviation; SpA, spondyloarthritis; T1DM, type 1 diabetes mellitus; T2DM, type 2 diabetes mellitus; UC, ulcerative colitis.

## References

4. European Medicines Agency (EMA). Guideline on similar biological medicinal products. 2014. Available at: [http://www.ema.europa.eu/docs/en\\_GB/document\\_library/Scientific\\_guideline/2014/10/WC500176768.pdf](http://www.ema.europa.eu/docs/en_GB/document_library/Scientific_guideline/2014/10/WC500176768.pdf). Accessed 5 Sep 2015.
5. Australian Therapeutic Goods Administration (TGA). Regulation of biosimilar medicines (Version 2.0, December 2015). Available at: [https://www.tga.gov.au/sites/default/files/evaluation-biosimilars-151217\\_0.pdf](https://www.tga.gov.au/sites/default/files/evaluation-biosimilars-151217_0.pdf). Accessed 5 Sep 2016.
8. Australian Pharmaceutical Benefits Scheme (PBS) Pharmaceutical Benefit Advisory Committee (PBAC). PBAC special meeting minutes. 2015. Available at: <http://www.pbs.gov.au/industry/listing/elements/pbac-meetings/pbac-outcomes/2015-04/2015-04-biosimilars.pdf>. Accessed 8 Sep 2016.
9. US Food and Drug Administration (FDA). Biosimilars: questions and answers regarding implementation of the biologics price competition and innovation act 2009: guidance for industry. 2015. Available at: <http://www.fda.gov/downloads/drugs/guidancecomplianceregulatoryinformation/guidances/ucm444661.pdf>. Accessed 8 Sep 2016.
15. European Commission. Consensus information paper: what you need to know about biosimilar medicinal products. 2013. Available at: <http://ec.europa.eu/DocsRoom/documents/8242>. Accessed 8 Sep 2016.
22. American College of Rheumatology (ACR). Position statement: biosimilars. 2016. Available at: <http://www.rheumatology.org/Portals/0/Files/Biosimilars-Position-Statement.pdf>. Accessed 11 Aug 2016.
23. Australian Diabetes Society (ADS) and Diabetes Australia and Australian Diabetes Educators Association (ADEA). Position statement: use of 'biosimilar' insulins for diabetes. 2015. Available at: <https://diabetessociety.com.au/documents/BiosimilarSubstitutionPositionStatementDAADSADeATBFV20150911.pdf>. Accessed 5 Sep 2016.
24. American Society of Clinical Oncology. ASCO policy brief: biosimilars. 2015. Available at: [McKinnon et al Biosimilars \(suppl\) final.docx](https://www.asco.org/sites/new-wwwascoorg/files/content-</a></li></ol></div><div data-bbox=)

- files/advocacy-and-policy/documents/2013\_biosilimars%20New.pdf.  
Accessed 5 Sep 2016.
25. National Rheumatoid Arthritis Society (NRAS). NRAS position paper on biosimilars – revised June 2016. Available at:  
<http://www.nras.org.uk/data/files/About%20RA/How%20is%20RA%20managed/NRAS%20Biosimilars%20Position%20Paper%20Final.pdf>. Accessed 5 Sep 2016.
  26. American Academy of Dermatology. Position paper on generic therapeutic & biosimilar substitution. 2013. Available at:  
<https://www.aad.org/Forms/Policies/Uploads/PS/PS-Generic%20Therapeutic%20and%20%20Biosimilar%20Substitution.pdf>. Accessed 6 Oct 2016.
  27. Taberero J, Vyas M, Giuliani R, Arnold D, Cardoso F, Casali PG, et al. Biosimilars: a position paper of the European Society for Medical Oncology, with particular reference to oncology prescribers. *ESMO Open*. 2017;1(6):e000142.
  28. Annese V, Vecchi M. Use of biosimilars in inflammatory bowel disease: statements of the Italian Group for Inflammatory Bowel Disease. *Dig Liver Dis*. 2014;46(11):963–8.
  29. Fiorino G, Girolomoni G, Lapadula G, Orlando A, Danese S, Olivieri I. The use of biosimilars in immune-mediated disease: a joint Italian Society of Rheumatology (SIR), Italian Society of Dermatology (SIDeMaST), and Italian Group of Inflammatory Bowel Disease (IG-IBD) position paper. *Autoimmun Rev*. 2014;13(7):751–5.
  30. Abad Hernández MA, Andreu JL, Caracuel Ruiz MA, Belmonte Serrano MA, Diaz-Gonzalez F, Moreno Muelas JV. Position paper from the Spanish Society of Rheumatology on biosimilar drugs. *Reumatol Clin*. 2015;11(5):269–78.
  32. Devlin SM, Bressler B, Bernstein CN, Fedorak RN, Bitton A, Singh H, et al. Overview of subsequent entry biologics for the management of inflammatory bowel disease and Canadian Association of Gastroenterology position statement on subsequent entry biologics. *Can J Gastroenterol*. 2013;27(10):567–71.
  33. Gastroenterological Society of Australia (GESA) and Australian Inflammatory Bowel Disease Association (AIBDA). GESA-AIBDA position on biosimilars



- substitution. 2015. Available at:  
[http://www.gesa.org.au/files/editor\\_upload/File/NEWS/Position%20on%20Biosimilars%20GESA\\_AIBDA.pdf](http://www.gesa.org.au/files/editor_upload/File/NEWS/Position%20on%20Biosimilars%20GESA_AIBDA.pdf). Accessed 6 Oct 2016.
35. Australian Rheumatology Association (ARA). ARA position on the introduction of biosimilars for the treatment of rheumatic diseases. 2016. Available at:  
<http://rheumatology.org.au/rheumatologists/documents/20161124%20ARA%20Position%20statement%20biosimilars%20Nov%202016%20final.pdf>. Accessed 13 Dec 2016.
36. Danese S, Gomollon F. ECCO position statement: the use of biosimilar medicines in the treatment of inflammatory bowel disease (IBD). *J Crohns Colitis*. 2013;7(7):586–9.
37. European League Against Rheumatism (EULAR). Biosimilars: what do patients need to consider? 2015. Available at:  
[http://www.eular.org/myUploadData/files/Biosimilars\\_2015.pdf](http://www.eular.org/myUploadData/files/Biosimilars_2015.pdf). Accessed 5 Sep 2016.
43. Abdalla A, Byrne N, Conway R, Walsh T, Mannion G, Hanly M, et al. Long-term safety and efficacy of biosimilar infliximab among patients with inflammatory arthritis switched from reference product. *Open Access Rheumatol*. 2017;9:29–35.
44. Ala K, Avery P, Wilson R, Prowse A, Shutt J, Jupp J, et al. Early experience with biosimilar infliximab at a district general hospital for an entire crohns disease patient cohort switch from remicade to inflectra. *Gut*. 2016;65:A81(abstract).
45. Arguelles-Arias F, Guerra Veloz MF, Perea Amarillo R, Vilches-Arenas A, Castro Laria L, Maldonado Perez B, et al. Effectiveness and safety of CT-P13 (biosimilar infliximab) in patients with inflammatory bowel disease in real life at 6 months. *Dig Dis Sci*. 2017;62(5):1305–12.
46. Bennett KJ, Heap GA, Hawkins S, Ahmad T. Prospective evaluation of the safety and efficacy of switching stable patients with inflammatory bowel disease from remicade™ to biosimilar Infliximab (IFX). *Gut*. 2016;65:A146(abstract).
47. Benucci M, Gobbi FL, Bandinelli F, Damiani A, Infantino M, Grossi V, et al. Safety, efficacy and immunogenicity of switching from innovator to biosimilar

- infliximab in patients with spondyloarthritis: a 6-month real-life observational study. *Immunol Res.* 2017;65(1):419–22.
48. Buer LC, Moum BA, Cvancarova M, Warren DJ, Medhus AW, Hoivik ML. Switching from Remicade® to Remsima® is well tolerated and feasible: a prospective, open-label study. *J Crohns Colitis.* 2017;11(3):297–304.
  49. Dapavo P, Vujic I, Fierro MT, Quaglino P, Sanlorenzo M. The infliximab biosimilar in the treatment of moderate to severe plaque psoriasis. *J Am Acad Dermatol.* 2016;75(4):736–9.
  50. Fiorino G, Manetti N, Armuzzi A, Orlando A, Variola A, Bonovas S, et al. The PROSIT-BIO cohort: a prospective observational study of patients with inflammatory bowel disease treated with infliximab biosimilar. *Inflamm Bowel Dis.* 2017;23(2):233–43.
  51. Gentileschi S, Barreca C, Bellisai F, Biasi G, Brizi MG, De Stefano R, et al. Switch from infliximab to infliximab biosimilar: efficacy and safety in a cohort of patients with different rheumatic diseases. Response to: Nikiphorou E, Kautiainen H, Hannonen P, et al. Clinical effectiveness of CT-P13 (Infliximab biosimilar) used as a switch from Remicade (infliximab) in patients with established rheumatic disease. Report of clinical experience based on prospective observational data. *Expert Opin Biol Ther.* 2015;15:1677–1683. *Expert Opin Biol Ther.* 2016:1–2.
  52. Glintborg B, Sorensen IJ, Loft AG, Lindegaard H, Linauskas A, Hendricks O, et al. A nationwide non-medical switch from originator infliximab to biosimilar CT-P13 in 802 patients with inflammatory arthritis: 1-year clinical outcomes from the DANBIO registry. *Ann Rheum Dis.* 2017;76:1426–31.
  53. Jorgensen KK, Olsen IC, Goll GL, Lorentzen M, Bolstad N, Haavardsholm EA, et al. Switching from originator infliximab to biosimilar CT-P13 compared with maintained treatment with originator infliximab (NOR-SWITCH): a 52-week, randomised, double-blind, non-inferiority trial. *Lancet.* 2017;389(10086):2304–16.
  54. Jung YS, Park DI, Kim YH, Lee JH, Seo PJ, Cheon JH, et al. Efficacy and safety of CT-P13, a biosimilar of infliximab, in patients with inflammatory bowel disease: a retrospective multicenter study. *J Gastroenterol Hepatol.* 2015;30(12):1705–12.

55. Kay J, Chopra A, Lassen C, Shneyer L, Wyand M. BOW015, a biosimilar infliximab: disease activity and disability outcomes from a phase 3 active comparator study in patients with active rheumatoid arthritis on stable methotrexate doses. *Ann Rheum Dis.* 2015;74(Suppl 2):462–3 (abstract).
56. Kay J, Lassen C, Trokan L, Wyand M. Safety profile of BOW015, a biosimilar infliximab, in healthy subjects and patients with active rheumatoid arthritis. *Ann Rheum Dis.* 2015;74(Suppl 2):706 (abstract).
57. Kolar M, Duricova D, Bortlik M, Hrubá V, Machkova N, Mitrova K, et al. Infliximab biosimilar (Remsima) in therapy of inflammatory bowel diseases patients: experience from one tertiary inflammatory bowel diseases centre. *Dig Dis.* 2017;35(1–2):91–100.
58. Nikiphorou E, Kautiainen H, Hannonen P, Asikainen J, Kokko A, Rannio T, et al. Clinical effectiveness of CT-P13 (infliximab biosimilar) used as a switch from Remicade (infliximab) in patients with established rheumatic disease. Report of clinical experience based on prospective observational data. *Expert Opin Biol Ther.* 2015;15(12):1677–83.
59. Park SH, Kim YH, Lee JH, Kwon HJ, Lee SH, Park DI, et al. Post-marketing study of biosimilar infliximab (CT-P13) to evaluate its safety and efficacy in Korea. *Expert Rev Gastroenterol Hepatol.* 2015;9(Suppl 1):35–44.
60. Park W, Suh CH, Shim SC, Molina FFC, Jeka S, Medina-Rodriguez FG, et al. Efficacy and safety of switching from innovator rituximab to biosimilar CT-P10 compared with continued treatment with CT-P10: results of a 56-week open-label study in patients with rheumatoid arthritis. *BioDrugs.* 2017 [Epub ahead of print].
61. Park W, Yoo DH, Miranda P, Brzosko M, Wiland P, Gutierrez-Urena S, et al. Efficacy and safety of switching from reference infliximab to CT-P13 compared with maintenance of CT-P13 in ankylosing spondylitis: 102-week data from the PLANETAS extension study. *Ann Rheum Dis.* 2017;76:346–54.
62. Rahmany S, Cotton S, Garnish S, Brown M, Saich R, Lloyd D, et al. In patients with IBD switching from originator infliximab (REMICADE) to biosimilar infliximab (CT-P13) is safe and effective. *Gut.* 2016;65:A89(abstract).

63. Razanskaite V, Bettey M, Downey L, Wright J, Callaghan J, Rush M, et al. Biosimilar infliximab in inflammatory bowel disease: outcomes of a managed switching programme. *J Crohns Colitis*. 2017;11(6):690–6.
64. Rubio E, Ruiz A, Lopez J, Lopez-Chozas JM, Bermudez L, Aguilera C, et al. Prospective study of 78 patients treated with infliximab biosimilar Remsima®. *Ann Rheum Dis*. 2016;75(Suppl 2):1006 (abstract).
65. Sheppard M, Hadavi S, Hayes F, JKent J, Dasgupta B. Preliminary data on the introduction of the infliximab biosimilar (CT-P13) to a real world cohort of rheumatology patients. *Ann Rheum Dis*. 2016;75(Suppl 2):1011 (abstract).
66. Sieczkowska J, Jarzebicka D, Banaszkiwicz A, Plocek A, Gawronska A, Toporowska-Kowalska E, et al. Switching between infliximab originator and biosimilar in paediatric patients with inflammatory bowel disease. Preliminary observations. *J Crohns Colitis*. 2016;10(2):127–32.
67. Schmitz EMH, Benoy-De Keuster S, Meier AJL, Scharnhorst V, Traksel RAM, Broeren MAC, et al. Therapeutic drug monitoring (TDM) as a tool in the switch from infliximab innovator to biosimilar in rheumatic patients: results of a 12-month observational prospective cohort study. *Clin Rheumatol*. 2017 [Epub ahead of print].
68. Smits LJ, Derikx LA, de Jong DJ, Boshuizen RS, van Esch AA, Drenth JP, et al. Clinical outcomes following a switch from Remicade® to the biosimilar CT-P13 in inflammatory bowel disease patients: a prospective observational cohort study. *J Crohns Colitis*. 2016;10:1287–93.
69. Smolen JS, Choe J-Y, Prodanovic N, Niebrzydowski J, Staykov I, Dokoupilova E, et al. Comparable safety and immunogenicity and sustained efficacy after transition to SB2 (an infliximab biosimilar) vs ongoing infliximab reference product in patients with rheumatoid arthritis: results of phase III transition study. *Ann Rheum Dis*. 2016;75(Suppl 2):488 (abstract).
70. Tanaka Y, Yamanaka H, Takeuchi T, Inoue M, Saito K, Saeki Y, et al. Safety and efficacy of CT-P13 in Japanese patients with rheumatoid arthritis in an extension phase or after switching from infliximab. *Mod Rheumatol*. 2017;27(2):237–45.
71. Tweehuysen L, Van Den Bemt BJF, Van Ingen IL, De Jong AJL, Van Der Laan WH, Van Den Hoogen FHJ, et al. Clinical and immunogenicity outcomes after switching treatment from innovator infliximab to biosimilar

- infliximab in rheumatic diseases in daily clinical practice. *Arthritis Rheumatol.* 2016;68:821–23 (abstract).
72. Yazici Y, Xie L, Ogbomo A, Parenti D, Goyal K, Teeple A, et al. A descriptive analysis of real-world treatment patterns in a Turkish rheumatology population that continued innovator infliximab (Remicade) therapy or switched to biosimilar infliximab. *Arthritis Rheumatol.* 2016;68:2903–06(abstract).
73. Yoo DH, Prodanovic N, Jaworski J, Miranda P, Ramiterre E, Lanzon A, et al. Efficacy and safety of CT-P13 (biosimilar infliximab) in patients with rheumatoid arthritis: comparison between switching from reference infliximab to CT-P13 and continuing CT-P13 in the PLANETRA extension study. *Ann Rheum Dis.* 2017;76:355–63.
74. Haag-Weber M, Vetter A, Thyroff-Friesinger U. Therapeutic equivalence, long-term efficacy and safety of HX575 in the treatment of anemia in chronic renal failure patients receiving hemodialysis. *Clin Nephrol.* 2009;72(5):380–90.
75. Harzallah A, Zouaghi K, Dridi A, Boubaker K, Beji S, Ayari M, et al. Therapeutic efficacy of a biosimilar epoetin alfa in hemodialysis patients. *Saudi J Kidney Dis Transpl.* 2015;26(1):78–82.
76. Horbrand F, Bramlage P, Fischaleck J, Hasford J, Brunkhorst R. A population-based study comparing biosimilar versus originator erythropoiesis-stimulating agent consumption in 6,117 patients with renal anaemia. *Eur J Clin Pharmacol.* 2013;69(4):929–36.
77. Lopez MJ, García del Busto N, Carrascosa O, Mejía L, Antonino G, De La Vega I, et al. Biosimilar epoetin zeta in the treatment of chemotherapy-induced anaemia. *Eur J Hosp Pharm.* 2014;21:A38–9.
78. Minutolo R, Borzumati M, Sposini S, Abaterusso C, Carraro G, Santoboni A, et al. Dosing penalty of erythropoiesis-stimulating agents after switching from originator to biosimilar preparations in stable hemodialysis patients. *Am J Kidney Dis.* 2016;68(1):170–2.
79. Morosetti M, Dominijanni S, Calzona AB, Zappalà L, Nicolais R, Di Turi R. [Switch to biosimilars in hemodialysis patients: efficacy, safety and cost analysis in a single centre]. *Ricerca e Pratica.* 2017;33(1):5–12.

80. Ohta S, Yasuno N, Inomoto Y, Matsuda K, Nakagawa Y, Sasagawa I, et al. Efficacy of once or twice weekly administration of epoetin kappa in patients receiving hemodialysis: a retrospective study. *Exp Ther Med*. 2014;7(1):27–30.
81. Wiecek A, Ahmed I, Scigalla P, Koytchev R. Switching epoetin alfa and epoetin zeta in patients with renal anemia on dialysis: posthoc analysis. *Adv Ther*. 2010;27(12):941–52.
82. Wizemann V, Rutkowski B, Baldamus C, Scigalla P, Koytchev R. Comparison of the therapeutic effects of epoetin zeta to epoetin alfa in the maintenance phase of renal anaemia treatment. *Curr Med Res Opin*. 2008;24(3):625–37.
83. Balili CAV, Mendoza ESR, Mercado-Asis LB. Shifting to biosimilar insulin preparation: impact on glycemic control and cost. *Endocrine Reviews*. 2015;36:(abstract).
84. Hadjiyianni I, Dahl D, Lacaya LB, Pollom RK, Chang CL, Ilag LL. Efficacy and safety of LY2963016 insulin glargine in patients with type 1 and type 2 diabetes previously treated with insulin glargine. *Diabetes Obes Metab*. 2016;18(4):425–9.
85. Ilag LL, Deeg MA, Costigan T, Hollander P, Blevins TC, Edelman SV, et al. Evaluation of immunogenicity of LY2963016 insulin glargine compared with Lantus(R) insulin glargine in patients with type 1 or type 2 diabetes mellitus. *Diabetes Obes Metab*. 2016;18(2):159–68.
86. Rosenstock J, Hollander P, Bhargava A, Ilag LL, Pollom RK, Zielonka JS, et al. Similar efficacy and safety of LY2963016 insulin glargine and insulin glargine (Lantus(R)) in patients with type 2 diabetes who were insulin-naive or previously treated with insulin glargine: a randomized, double-blind controlled trial (the ELEMENT 2 study). *Diabetes Obes Metab*. 2015;17(8):734–41.
87. Segal D, Tupy D, Distiller L. The Biosulin equivalence in standard therapy (BEST) study – a multicentre, open-label, non-randomised, interventional, observational study in subjects using Biosulin 30/70 for the treatment of insulin-dependent type 1 and type 2 diabetes mellitus. *S Afr Med J*. 2013;103(7):458–60.

88. Flodmark CE, Lilja K, Woehling H, Jarvholm K. Switching from originator to biosimilar human growth hormone using dialogue teamwork: single-center experience from Sweden. *Biol Ther.* 2013;3:35–43.
89. Gila AG, Garcia MP. Switching from the original to the biosimilar recombinant human GH-Omnitrope®: an experience of a single paediatric centre in Spain. *Horm Res Paediatr.* 2014;82:414 (abstract).
90. Rashid N, Saenger P, Wu YL, Woehling H, Frankel M, Lifshitz F, et al. Switching to Omnitrope® from other recombinant human growth hormone therapies: a retrospective study in an integrated healthcare system. *Biol Ther.* 2014;4(1–2):27–39.
91. Belleli R, Fisch R, Renard D, Woehling H, Gsteiger S. Assessing switchability for biosimilar products: modelling approaches applied to children's growth. *Pharm Stat.* 2015;14(4):341–9.
92. Romer T, Zabransky M, Walczak M, Szalecki M, Balsler S. Effect of switching recombinant human growth hormone: comparative analysis of phase 3 clinical data. *Biol Ther.* 2011;1:5.
93. Engert A, Griskevicius L, Zyuzgin Y, Lubenau H, del Giglio A. XM02, the first granulocyte colony-stimulating factor biosimilar, is safe and effective in reducing the duration of severe neutropenia and incidence of febrile neutropenia in patients with non-Hodgkin lymphoma receiving chemotherapy. *Leuk Lymphoma.* 2009;50(3):374–9.
94. Gatzemeier U, Ciuleanu T, Dediu M, Ganea-Motan E, Lubenau H, Del Giglio A. XM02, the first biosimilar G-CSF, is safe and effective in reducing the duration of severe neutropenia and incidence of febrile neutropenia in patients with small cell or non-small cell lung cancer receiving platinum-based chemotherapy. *J Thorac Oncol.* 2009;4(6):736–40.
95. Krendyukov A, Harbeck N, Gascon P, Gattu S, Li Y, Blackwell KL. Safety and efficacy of alternating treatment with EP2006, a filgrastim biosimilar, and reference filgrastim for the prevention of severe neutropenia, in patients with breast cancer receiving myelosuppressive chemotherapy. *J Clin Oncol.* 2017;35(suppl):abstr 10116 (abstract).
96. Gooderham M, Spelman L, Kaliaperumal A, Costanzo A, Narbutt J, Zhang N, et al. Single transition from adalimumab to ABP 501: evaluation of

- immunogenicity in a phase 3 study in subjects with moderate to severe plaque psoriasis. *J Am Acad Dermatol*. 2016;74(5):AB275 (abstract).
97. Papp K, Bachelez H, Costanzo A, Foley P, Gooderham M, Kaur P, et al. Clinical similarity of biosimilar ABP 501 to adalimumab in the treatment of patients with moderate to severe plaque psoriasis: a randomized, double-blind, multicenter, phase III study. *J Am Acad Dermatol*. 2017;76(6):1093–102.
  98. Weinblatt M, Baranauskaite A, Niebrzydowski J, Dokoupilova E, Zielinska A, Sitek-Ziolkowska K, et al. Sustained efficacy and comparable safety and immunogenicity after transition to SB5 (an adalimumab biosimilar) vs continuation of the adalimumab reference product in patients with rheumatoid arthritis: results of phase III study EUCLAR 2016; 8–11 June 2016; London UK (abstract FRI0161). 2016.
  99. Nasonov E, Mazurov V, Plaksina T, Nesmeyanova O, Knyazeva L, Eremeeva A, et al. Interchangeability of innovator rituximab and its biosimilar: results from international controlled comparative 1-year study in patients with active rheumatoid arthritis. *Arthritis Rheumatol*. 2016;68:2046–47.
  100. Roy PS, John S, Karankal S, Kannan S, Pawaskar P, Gawande J, et al. Comparison of the efficacy and safety of Rituximab (Mabthera) and its biosimilar (Reditux) in diffuse large B-cell lymphoma patients treated with chemo-immunotherapy: a retrospective analysis. *Indian J Med Paediatr Oncol*. 2013;34(4):292–8.
  101. Emery P, Vencovský J, Sylwestrzak A, Leszczyński P, Porawska W, Stasiuk B, et al. Additional efficacy results of SB4 (etanercept biosimilar) up to week 100: comparison between continuing SB4 and switching from reference etanercept (enbrel®) to SB4. *Arthritis Rheumatol*. 2016;68(suppl 10):789–90 (abstract).
  102. Emery P, Vencovsky J, Sylwestrzak P, Leszczynski P, Porawska W, Stasiuk B, et al. Long-term safety and efficacy of SB4 (etanercept biosimilar) in patients with rheumatoid arthritis: comparison between continuing SB4 and switching from etanercept reference product to SB4 *Ann Rheum Dis*. 2016;75(Suppl 2):236 (abstract).
  103. Griffiths CEM, Thaci D, Gerdes S, Arenberger P, Pulka G, Kingo K, et al. The EGALITY study: a confirmatory, randomized, double-blind study comparing the efficacy, safety and immunogenicity of GP2015, a proposed etanercept



- biosimilar, vs. the originator product in patients with moderate-to-severe chronic plaque-type psoriasis. *Br J Dermatol.* 2017;176(4):928–38.
104. Strowitzki T, Kuczynski W, Mueller A, Bias P. Safety and efficacy of Ovaleap® (recombinant human follicle-stimulating hormone) for up to 3 cycles in infertile women using assisted reproductive technology: a phase 3 open-label follow-up to main study. *Reprod Biol Endocrinol.* 2016;14(1):31.
105. Glintborg B, Kringelbach T, Hogdall E, Sorensen IJ, Jensen DV, Loft AG, et al. Non-medical switch from originator to biosimilar infliximab among patients with inflammatory rheumatic disease – impact on S-infliximab and antidrug-antibodies. Results from the National Danish Rheumatologic Biobank and the Danbio Registry. *Ann Rheum Dis.* 2016;75(Suppl 2):224 (abstract).
129. Ekelund M, Bidad C, Gomez R. To the editor; a commentary on "Switching from originator to biosimilar human growth hormone using a dialogue teamwork: single-center experience from Sweden". *Biol Ther.* 2014;4(1–2):69–71.
